# Supplementary material for: Can mitochondrial dysfunction be initiated by dissociative electron attachment to xenobiotics?
Source: Royal Society of Chemistry journal article supplement (doi:10.1039/c3cp50614b), 2013-01-01
Supplement: c3cp50614b.pdf [file c3cp50614b.pdf]

## Supplementary data

**Figure S.1.** (Upper panels): Sections of negative ion mass spectra of **2,4-D** and **DDE** recorded at thermal energy of incident electron indicating broad metastable anion peaks at fractional mass numbers. (Lower panels): Currents of mass-selected metastable anions formed by DEA to **2,4-D** and **DDE** as a function of incident electron energy. The intensity scale is the same to that shown in Figures 2 and 3.

**Figure S.2.** Integral intensity (normalized to the most intense signals at the  $m/e = 35$  at  $200\text{ }^{\circ}\text{C}$ ) of mass-selected anion currents formed by DEA to **2,4-D**, **DDT** and **DDE** as a function of the collision cell temperature. Solid lines represent the best exponential fit of experimental data prolonged toward low temperatures.

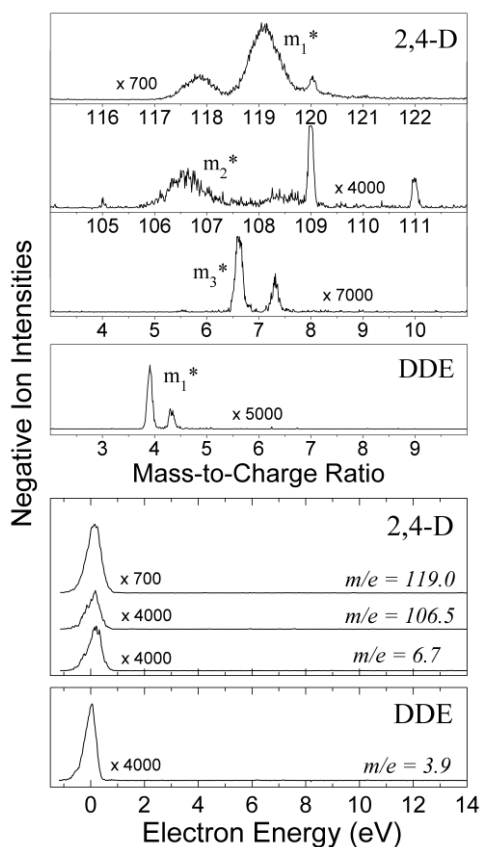

**Figure S.1**

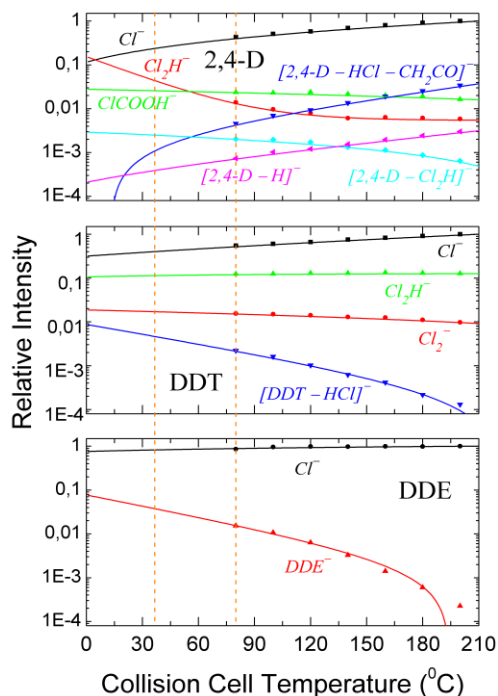

**Figure S.2**
